# Supplementary material for: The Abridgment and Relaxation Time for a Linear Multi-Scale Model Based on Multiple Site Phosphorylation
Source: PLOS journal article supplement (doi:10.1371/journal.pone.0133295), 2015-08-11
Supplement: S1 (10.1371/journal.pone.0133295.s001) [file journal.pone.0133295.s001]

## S1 Appendix. Reaction rate for the reduced system.

Let

$$L = \begin{bmatrix} I & 0 \\ -\mathbf{1}^T & 1 \end{bmatrix}, \quad (1)$$

where  $I$  is the identity matrix of dimension  $n - 1$ . Then with a similarity transformation by  $L$  we have

$$L^{-1}AL = \begin{bmatrix} \tilde{B} & y \\ f_n \mathbf{1}^T & -f_n \end{bmatrix}. \quad (2)$$

Let  $\beta$  denote the solution for equation (29). We construct a nonsingular matrix

$$M = \begin{bmatrix} I & \beta \\ 0 & 1 \end{bmatrix}. \quad (3)$$

Continue the similarity transformation by  $M$ , we have

$$\mathbb{A} = M^{-1}L^{-1}ALM = \begin{bmatrix} \tilde{B} - f_n \beta \mathbf{1}^T & f_n(1 - \mathbf{1}^T \beta) \\ f_n \mathbf{1}^T & -f_n(1 - \mathbf{1}^T \beta) \end{bmatrix}. \quad (4)$$

When  $f_n \ll 1/T_{relax}$ ,  $f_n$  is small. Let  $\gamma = -f_n(1 - \mathbf{1}^T \beta)$  and

$$\bar{A} = \begin{bmatrix} \tilde{B} - f_n \beta \mathbf{1}^T & 0 \\ f_n \mathbf{1}^T & \gamma \end{bmatrix}. \quad (5)$$

Then the eigenvalues of  $A$  can be approximated by corresponding eigenvalues of  $\bar{A}$ .

Note that  $\gamma$  is an eigenvalue of  $\bar{A}$  and  $|\gamma| < f_n$ , according to (23)

$|\lambda_n| < f_n \ll \min_{1 \leq i \leq n-1} |\hat{\lambda}_i|$ . Thus  $\gamma$  approximates  $\lambda_n$ .

We denote the perturbation matrix as

$$E = \mathbb{A} - \bar{A} = \begin{bmatrix} 0 & -\gamma\beta \\ 0 & 0 \end{bmatrix}. \quad (6)$$

From the Bauer and Fike theorem [14], we have that

$$|\lambda_n - \gamma| \leq \|E\| \leq |\gamma|. \quad (7)$$

This estimation allows a large relative error. To accurately estimate the relative error, we note that  $\mathbb{A}$  is similar to  $A$ , which is diagonalizable. Then according to Corollary 2.2 in Eisenstat and Ipsen [15], we have

$$\frac{|\lambda_n - \gamma|}{|\lambda_n|} \leq \|\mathbb{A}^{-1}E\| = \left\| \begin{bmatrix} 0 & -\gamma\tilde{B}^{-1}\beta \\ 0 & f_n \mathbf{1}^T \tilde{B}^{-1}\beta \end{bmatrix} \right\| = O\left(\frac{f_n}{\min_{1 \leq i \leq n-1} |\hat{\lambda}_i|}\right) = O(f_n T_{relax}). \quad (8)$$

Thus when condition (23) is satisfied,  $\lambda_n$  can be well approximated by  $\gamma$ .
